# Supplementary material for: Gender differences in weight gain during attempted and successful smoking cessation on dulaglutide treatment: a predefined secondary analysis of a randomised trial
Source: HighWire-hosted journal article supplement (doi:10.1136/bmjnph-2023-000781), 2023-12-01
Supplement: bmjnph-2023-000781supp001_data_supplement.pdf [file bmjnph-2023-000781supp001_data_supplement.pdf]

|    |                                                                                              |   |
|----|----------------------------------------------------------------------------------------------|---|
| 1  | Supplementary material                                                                       |   |
| 2  | Gender differences in weight gain during attempted and successful smoking cessation on       |   |
| 3  | dulaglutide treatment                                                                        |   |
| 4  | TABLE OF CONTENTS                                                                            |   |
| 5  | PREDEFINED LIST OF REASONS FOR SMOKING CESSATION .....                                       | 2 |
| 6  | TABLE S1 CHANGES WEIGHT AND BMI BETWEEN TREATMENT GROUPS.....                                | 3 |
| 7  | TABLE S2 CHANGES IN WEIGHT AND BMI BETWEEN TREATMENT GROUPS IN INDIVIDUALS WHO QUIT SMOKING. |   |
| 8  | .....                                                                                        | 4 |
| 9  | FIGURE S1 WEIGHT CHANGE BY TREATMENT AND SMOKING STATUS (BASELINE TO WEEK 12) .....          | 5 |
| 10 | FIGURE S2 RELATIVE WEIGHT CHANGE IN INDIVIDUALS WHO QUIT SMOKING (BASELINE TO WEEK 12) ..... | 6 |
| 11 |                                                                                              |   |

12 **Predefined list of reasons for smoking cessation**

13 1.) Health in general

14 2.) Specific health problems

15 3.) Symptoms of smoking

16 4.) Tobacco associated disease

17 5.) Self-concept

18 6.) Dependence

19 7.) Saving money

20 8.) Passive smoking

21 9.) Social pressure

22 10.) Be a model for children

23 11.) (Planned) pregnancy

24 12.) Others

25

26 **Table S1 Changes weight and BMI between treatment groups.**

27

|                                  | <b>Placebo</b>     |                  | <b>Dulaglutide</b> |                  |
|----------------------------------|--------------------|------------------|--------------------|------------------|
|                                  | <b>Female (72)</b> | <b>Male (56)</b> | <b>Female (83)</b> | <b>Male (44)</b> |
| <b>Weight (kg)</b>               |                    |                  |                    |                  |
| baseline                         | 72.6 (13.2)        | 92.2 (17.2)      | 71.6 (13.4)        | 93.0 (16.9)      |
| week 12                          | 75.0 (13.9)        | 94.3 (17.6)      | 70.4 (13.7)        | 94.0 (17.6)      |
| <b>BMI (kg/m<sup>2</sup>)</b>    |                    |                  |                    |                  |
| baseline                         | 25.8 (4.4)         | 28.9 (5.1)       | 26.1 (5.1)         | 28.9 (4.8)       |
| week 12                          | 26.7 (4.7)         | 29.5 (5.3)       | 25.4 (5.1)         | 29.2 (4.9)       |
| Data are presented in mean (SD). |                    |                  |                    |                  |

28

29

30 **Table S2 Changes in weight and BMI between treatment groups in individuals who quit**  
31 **smoking.**

| INDIVIDUALS WHO QUIT<br>SMOKING  | Placebo     |             | Dulaglutide |             |
|----------------------------------|-------------|-------------|-------------|-------------|
|                                  | Female (47) | Male (36)   | Female (51) | Male (29)   |
| <b>Weight (kg)</b>               |             |             |             |             |
| baseline                         | 73.6 (14.3) | 93.2 (18.4) | 70.4 (11.8) | 96.8 (16.3) |
| week 12                          | 75.7 (14.6) | 95.3 (18.9) | 69.7 (12.4) | 96.9 (17.2) |
| <b>BMI (kg/m<sup>2</sup>)</b>    |             |             |             |             |
| baseline                         | 26.3 (4.9)  | 29.1 (5.5)  | 25.8 (4.9)  | 29.9 (4.9)  |
| week 12                          | 27.0 (5.0)  | 29.9 (5.8)  | 25.5 (5.1)  | 29.8 (4.9)  |
| Data are presented in mean (SD). |             |             |             |             |

32

33

34 **Figure S1 Weight change by treatment and smoking status (baseline to week 12)**

35 Weight change among females, separated by smoking status and treatment group (A). Weight  
36 change among males, separated by smoking status and treatment group (B). Boxes span the  
37 interquartile range (IQR); the thick horizontal line is the median. Whiskers are the most extreme  
38 values lying within the box edge and 1.5 times the IQR. Outliers are represented as points, one  
39 outlier from the male-dulaglutide group is not represented for better presentation. For better  
40 presentation, we used the shorter term “quitters” for individuals who quit and similarly,  
41 “smokers” for individuals who continued smoking.

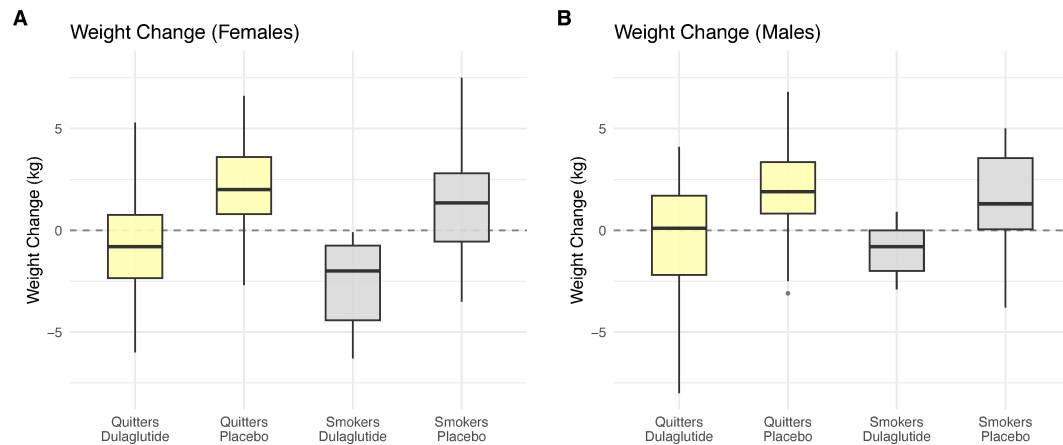

42

43

44 **Figure S2 Relative weight change in individuals who quit smoking (baseline to week 12)**  
 45 Relative weight change among females and males who quit smoking, separated by treatment  
 46 group. Bars represent each individual percentual weight change within the treatment period.

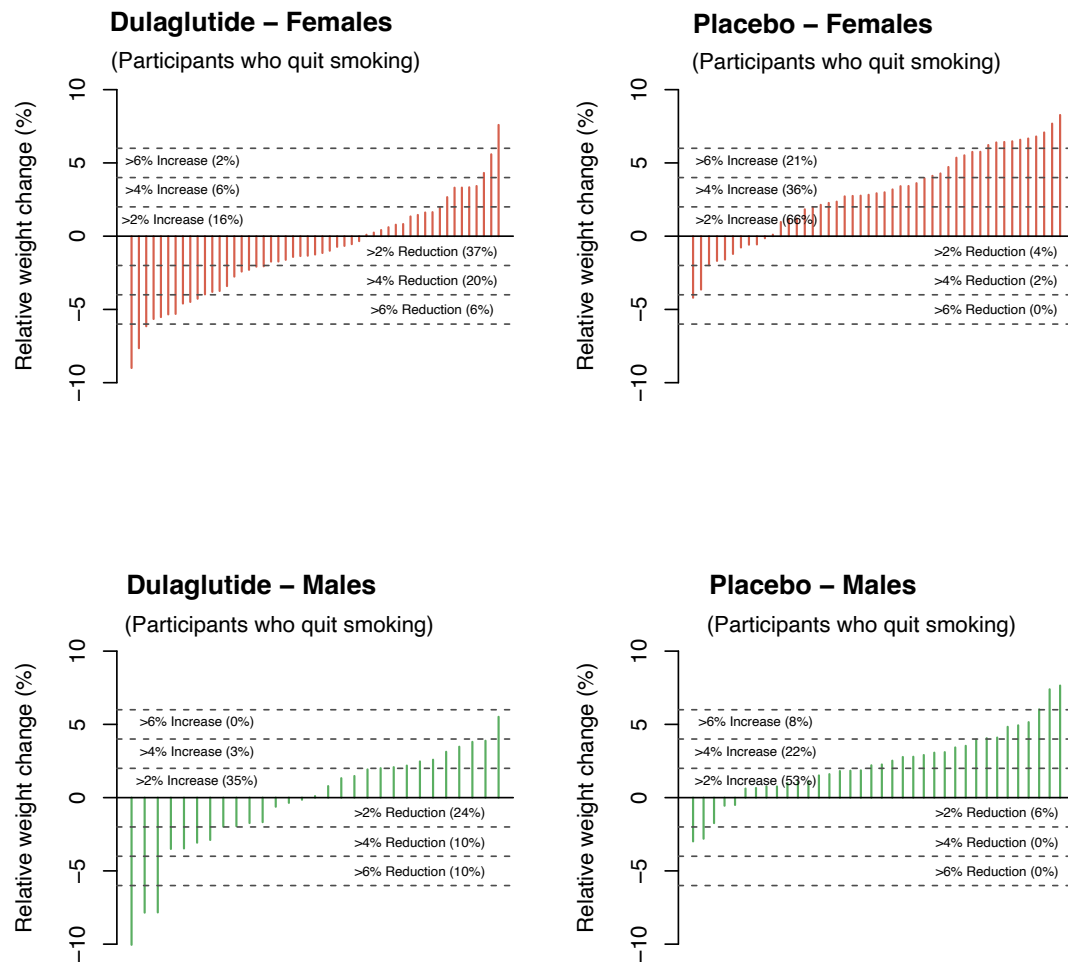

47
